# Supplementary material for: An extended-gate-type organic transistor for monitoring the Menschutkin reaction of tetrazole at a solid–liquid interface
Source: Royal Society of Chemistry journal article supplement (doi:10.1039/d4cc03266g), 2024-01-01
Supplement: d4cc03266g1.pdf [file d4cc03266g1.pdf]

## Electronic Supplementary Information

### An extended-gate-type organic transistor for monitoring the Menschutkin reaction of tetrazole at a solid–liquid interface

Yui Sasaki,<sup>a,b,c</sup> Kohei Ohshiro,<sup>b</sup> Xiaojun Lyu,<sup>b</sup> Takayuki Kawashima,<sup>b</sup> Masao Kamiko,<sup>b</sup> Hikaru Tanaka,<sup>d</sup> Akari Yamagami,<sup>d</sup> Yoshinori Ueno<sup>d</sup> and Tsuyoshi Minami<sup>\*b</sup>

---

<sup>a</sup> Research Center for Advanced Science and Technology, The University of Tokyo, 4-6-1, Komaba, Meguro-ku, Tokyo, 153-8904 Japan

<sup>b</sup> Institute of Industrial Science, The University of Tokyo, 4-6-1 Komaba, Meguro-ku, Tokyo, 153-8505, Japan.

Corresponding author: tminami@g.ecc.u-tokyo.ac.jp

<sup>c</sup> JST, PRESTO, 4-1-8 Honcho, Kawaguchi, Saitama, 332-0012, Japan

<sup>d</sup> Corporate Research Center, Toyobo Co., Ltd., 2-1-1 Katata, Otsu, Shiga, Japan

#### Contents

|                                                                       |    |
|-----------------------------------------------------------------------|----|
| 1. General                                                            | S2 |
| 2. Fabrication and operation of the OFET                              | S3 |
| 3. Fabrication and characterization of the extended-gate Au electrode | S4 |
| 4. Time-dependency test                                               | S6 |
| 5. Synthesis and Identification of an alkylated EMT derivative        | S6 |
| 6. Selectivity test                                                   | S7 |
| 7. Semi-quantitative assay                                            | S9 |
| 8. References                                                         | S9 |

## 1. General

### Reagents and materials

Commercially available reagents and supplied materials were used for the OFET fabrication and chemical sensing without pre-treatments.

**For fabrication of the OFET device:** An OFET device was fabricated on a glass substrate (model: Eagle XG, 2 cm × 2.5 cm, Corning, Inc.). Metal electrodes were fabricated using an aluminum (Al) wire (1ϕ) (Furuuchi Chemical Co., Ltd.) and a gold (Au) particle (Tanaka Kikinzoku Kogyo Co., Ltd.). Tetradecylphosphonic acid (TDPA, Tokyo Chemical Industry Co., Ltd.) was employed to form a dielectric layer. Poly{2,5-bis(3-tetradecylthiophen-2-yl)thieno[3,2-*b*]thiophene} (PBTTC-14) and 1,2-dichlorobenzene were obtained from Merck KGaA. 2-Propanol was purchased from Kanto Chemical Co. Inc. An amorphous hydrophobic material (CYTOP™, model: CTL-809M) was supplied from AGC Co., Ltd.

**For fabrication of the extended-gate-electrode:** Tris(2-carboxyethyl)phosphine (TCEP) hydrochloride as a reducing agent and methanol were obtained from FUJIFILM Wako Pure Chemical Industries, Ltd. and Kanto Chemical Co. Inc., respectively. A polyethylene naphthalate (PEN) film and 1-hydroxyethyl-5-mercapto-1*H*-tetrazole (EMT) were supplied from TOYOBO Co., Ltd.

**For electrical measurements:** An Ag/AgCl electrode as a reference electrode (RE-1B) and a Pt wire as a counter electrode were purchased from BAS Inc. A conductive silver paste (model: D-500), potassium chloride (KCl), sodium chloride (NaCl), and iodomethane (CH<sub>3</sub>I) were obtained from FUJIFILM Wako Pure Chemical Industries, Ltd. Electrophiles obtained from Tokyo Chemical Industry Co., Ltd. were iodoethane (CH<sub>3</sub>CH<sub>2</sub>I), 2-iodopropane ((CH<sub>3</sub>)<sub>2</sub>CH-I), 2-iodo-2-methylpropane ((CH<sub>3</sub>)<sub>3</sub>C-I), bromoethane (C<sub>2</sub>H<sub>5</sub>Br), and methyl trifluoromethanesulfonate (CF<sub>3</sub>SO<sub>3</sub>CH<sub>3</sub>). 4-(2-Hydroxyethyl)-1-piperazineethanesulfonic acid (HEPES) was purchased from Dojindo Laboratories Co., Ltd. All aqueous solutions were prepared by using Milli-Q water (18.2 MΩ·cm).

**For <sup>1</sup>H NMR analysis:** Methanol-*d*<sub>4</sub> was obtained from Cambridge Isotope Laboratories, Inc. Methanol was used as internal reference.

### Apparatuses

| Techniques                                           | Apparatus                                                        |
|------------------------------------------------------|------------------------------------------------------------------|
| Vacuum thermal deposition                            | SVC-700TMSGs, Sanyu Electron Co., Ltd.                           |
| Reactive ion etching (RIE)                           | SAMCO RIE-10NR                                                   |
| UV/O <sub>3</sub> treatment                          | ASM4010Z, ASUMI GIKEN Co., Ltd.                                  |
| Spin coat                                            | MIKASA SPINCOATER 1H-D7                                          |
| Measurements of the OFET characteristics             | 2612B, Keithley                                                  |
| Linear sweep voltammetry (LSV)                       | SP-300 potentiostat, Biologic                                    |
| Photoelectron yield spectroscopy (PYS) in air        | AC-2, Riken Keiki, Co.                                           |
| Contact angle measurements                           | CA-X contact Angle goniometer, Kyowa interface science Co., Ltd. |
| pH Adjustment                                        | Seven Excellence pH meter, Mettler-Toledo, Ltd.                  |
| Nuclear magnetic resonance (NMR)                     | JEOL ECZ-600                                                     |
| Electron impact ionization-mass spectrometry (EI-MS) | JEOL JMS-Q1500                                                   |
| Electrospray ionization-mass spectrometry (ESI-MS)   | Shimadzu LC2010cHT and a Shimadzu LCMS-2020                      |

## 2. Fabrication and operation of the OFET

### Fabrication of the OFET device

A glass substrate was treated with a piranha solution ( $\text{H}_2\text{SO}_4:\text{H}_2\text{O}_2 = 4:1$  (v/v)). On the treated glass substrate, an Al gate electrode (30 nm in thickness) was formed through thermal deposition along with a shadow mask. An RIE apparatus was applied to activate the surface of the Al gate electrode. After obtaining a gate dielectric layer (AlOx), the surface of the glass substrate was fully covered with a fluorinated polymer material (CYTOP™ (CLT-809 in CT-Solv. 180, ratio 1:1 (v/v))) by a spin-coat method. An annealing process for the glass substrate was performed in an inert atmosphere glovebox (UNICO, UL-1300A-MSP) at 110 °C for 10 min. Next, the RIE treatment was carried out using a shadow mask to form a hydrophobic bank layer made of CYTOP™ through an etching process. To form a self-assembled monolayer-based dielectric layer on the AlOx layer, the device was immersed in a 2-propanol solution containing TDPA (10 mM) for 15 h at 25 °C. The treated device was rinsed with 2-propanol and dried with  $\text{N}_2$  gas, followed by annealing at 110 °C for 30 min. After this period, an Au layer (30 nm in thickness) was deposited to form the source and drain electrodes. Subsequently, 1,2-dichlorobenzene solution containing PBTTC-C14 (0.0075wt%) was drop cast onto the channel region (width: 1000  $\mu\text{m}$ , length: 50 $\mu\text{m}$ ). After baking at 160 °C for 10 min, an organic semi-conductive layer was obtained. Finally, the CYTOP™ solution was spin-coated on the entire surface of the device and annealed at 110 °C for 10 min.<sup>S1, S2</sup>

### Operation of the OFET device

Basic device characteristics (Fig. S1(a) transfer and (b) output) were measured under ambient conditions. The transfer characteristics were recorded by scanning gate voltages ( $V_{\text{GS}} = 0.5$  to  $-3$  V) at a certain drain-source voltage ( $V_{\text{DS}} = -2$  V). The output characteristics were measured at  $V_{\text{DS}} = 0$  to  $-3$  V at each  $V_{\text{GS}}$  condition ( $V_{\text{GS}} = 0$  to  $-3$  V, step:  $-1$  V).

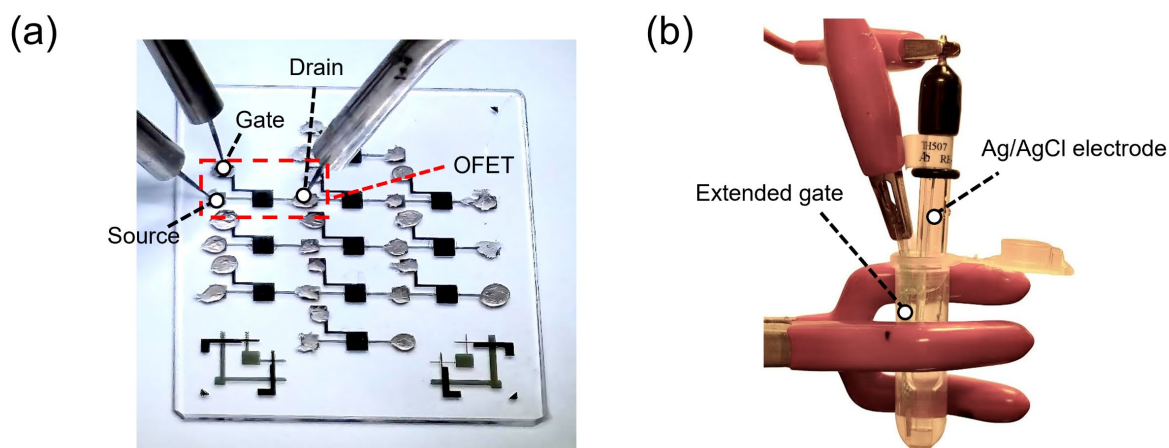

**Fig. S1** Photographs of (a) the fabricated OFET device and (b) the detection portion.

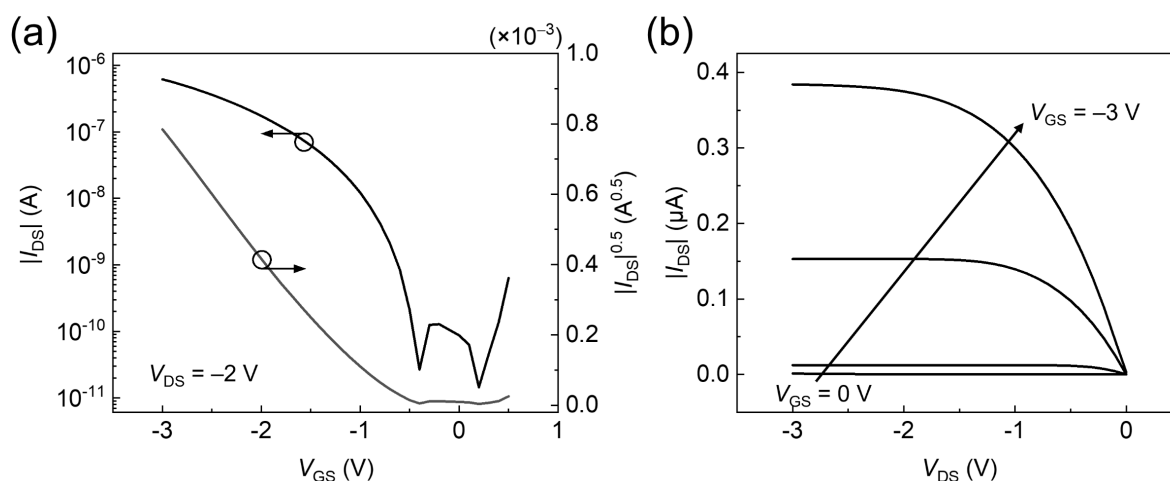

**Fig. S2** (a) Transfer curve ( $I_{DS} - V_{GS}$ ) at  $V_{DS} = -2$  V and (b) output curves ( $I_{DS} - V_{DS}$ ) at  $V_{GS} = 0 - -3$  V.

### 3. Fabrication and characterization of the extended-gate Au electrode

#### Fabrication of the extended-gate Au electrode

An extended-gate Au electrode (15 mm<sup>2</sup> for functionalization area, 100 nm in thickness) was thermally deposited on the PEN film. A metal mask was used for patterning. The surface of the extended-gate Au electrode was rinsed with methanol before SAM modification. The extended-gate electrode was immersed in a methanol solution containing EMT (1 mM) and TCEP (5 mM) at 25 °C for 60 min. After this period, the surface of the electrode was gently washed with ethanol and dried with N<sub>2</sub> gas.

#### Linear sweep voltammetry (LSV)

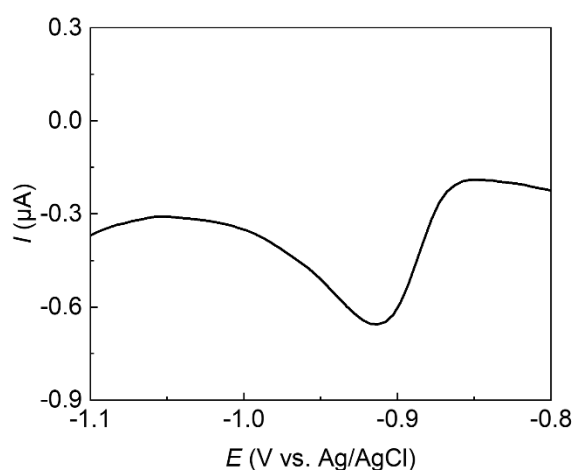

**Fig. S3** Linear sweep voltammetry to estimate the molecular density of EMT on the extended-gate Au electrode (evaluated area: 15 mm<sup>2</sup>). The electrochemical measurement was performed in a KOH solution (0.1 M) with three repetitive measurements from 0 V to -1.2 V at 10 mV/s as the scan rate. Faraday's law with the integration of the peak area was applied to determine the molecular density.

### Photoelectron yield spectroscopy (PYS) in air

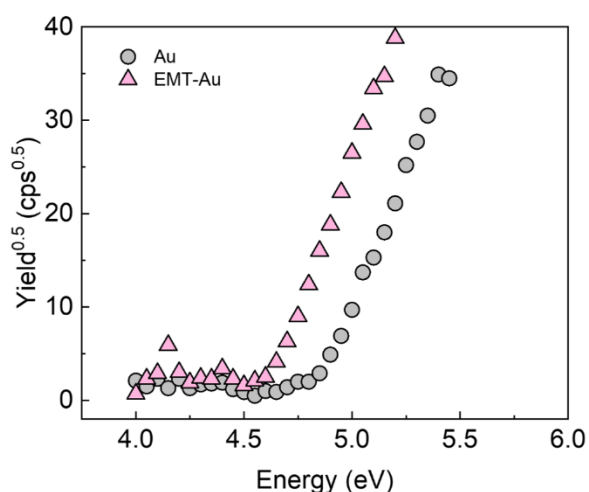

**Fig. S4** PYS measurements of the extended-gate Au electrode before (grey circle,  $4.89\pm 0.04$  eV) and after functionalization of EMT (pink triangle,  $4.76\pm 0.02$  eV).

### Contact angle measurements

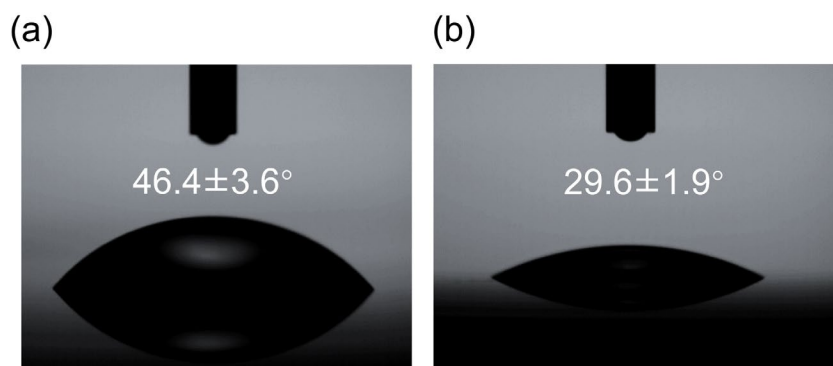

**Fig. S5** Contact angles of water droplets on the extended-gate Au electrode (a) before ( $46.4\pm 3.6^\circ$ ) and (b) after functionalization of EMT ( $29.6\pm 1.9^\circ$ ) ( $n = 3$ ).

### X-ray photoelectron spectroscopy (XPS)

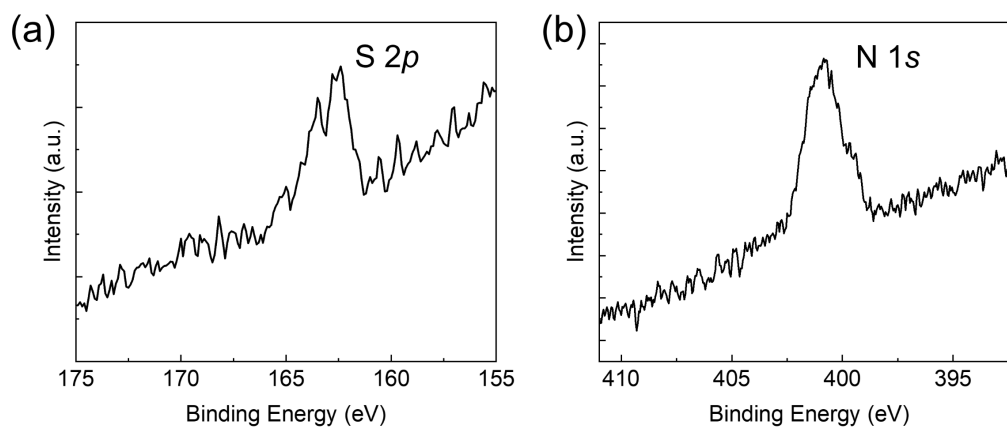

**Fig. S6** XPS core-level spectra of (a) S 2p and (b) N 1s derived from the EMT-modified Au electrode.

## 4. Time-dependency test

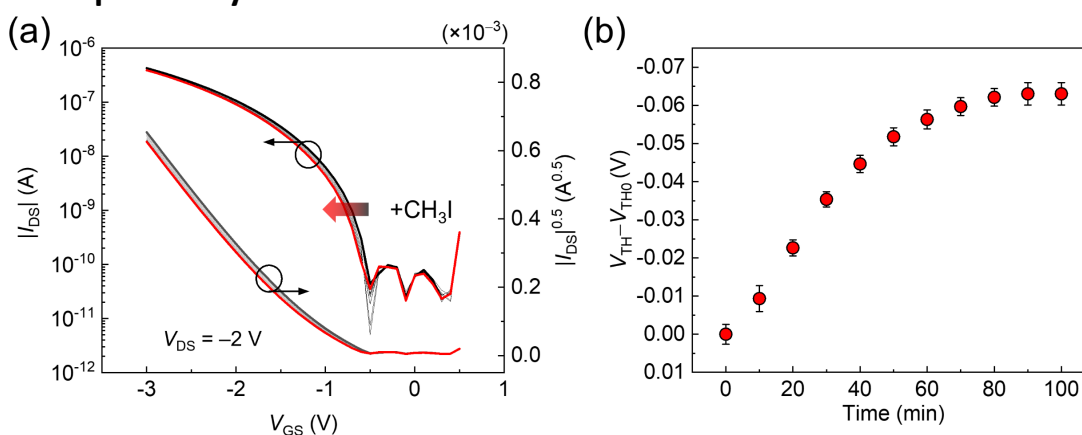

**Fig. S7** (a) Time-dependent changes in the transfer characteristics of the EMT-attached OFET upon adding  $\text{CH}_3\text{I}$  ( $100 \mu\text{M}$ ) in  $100 \text{ mM}$  HEPES buffer with  $100 \text{ mM}$  NaCl at pH 7.4. (b) The titration isotherm obtained by collecting  $V_{\text{TH}}$  at each measurement time from 0 to 100 min. The terms  $V_{\text{TH0}}$  and  $V_{\text{TH}}$ , respectively, indicate threshold voltages before and after adding  $\text{CH}_3\text{I}$ . Three repetitive evaluations were carried out for each measurement time.

## 5. Synthesis and identification of an alkylated EMT derivative

### Synthesis and $^1\text{H}$ NMR analysis

**1-Hydroxyethyl-5-methylthio-1H-tetrazole:** EMT (44.5 mg, 0.304 mmol) was dissolved in 2-propanol (10 mL) in a round bottom flask. Iodomethane (213 mg, 1.50 mmol) was added to the solution and refluxed at  $80^\circ\text{C}$  for 15 h. After the removal of the solvent *in vacuo*, the product was dried at  $60^\circ\text{C}$  for 3 days under vacuum conditions (quant.).  $^1\text{H}$  NMR (600 MHz, methanol- $d_4$ ):  $\delta$ (ppm) 4.40 (t, 2H,  $J = 5.1 \text{ Hz}$ ), 3.94 (t, 2H,  $J = 5.7 \text{ Hz}$ ), 2.77 (s, 3H). MS (EI, +)  $m/z$ : 160 [EMT-H+ $\text{CH}_3$ ] $^{+}$ .

**Reaction of 1-hydroxyethyl-5-methylthio-1H-tetrazole and  $\text{CH}_3\text{I}$  in a solution:** Iodomethane (64.8 g, 482 mmol) was mixed with 1-hydroxyethyl-5-methylthio-1H-tetrazole (48.7 mg, 304  $\mu\text{mol}$ ) without adding other solvents. After refluxing for 4 days, iodomethane was removed *in vacuo*. The residue was identified by  $^1\text{H}$  NMR,  $^1\text{H}$ - $^1\text{H}$  COSY,  $^1\text{H}$ - $^{13}\text{C}$  HMQC,  $^1\text{H}$ - $^{13}\text{C}$  HMBC, and ESI-MS analyses.

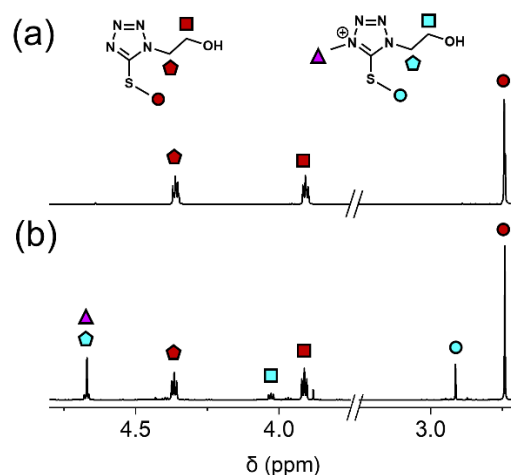

**Fig. S8**  $^1\text{H}$  NMR spectra (600 MHz,  $\text{MeOH-}d_4$ ) of (a) 1-hydroxyethyl-5-methylthio-1H-tetrazole and (b) a mixture of 1-hydroxyethyl-5-methylthio-1H-tetrazole and  $\text{CH}_3\text{I}$  after the reaction.

## ESI-MS analysis

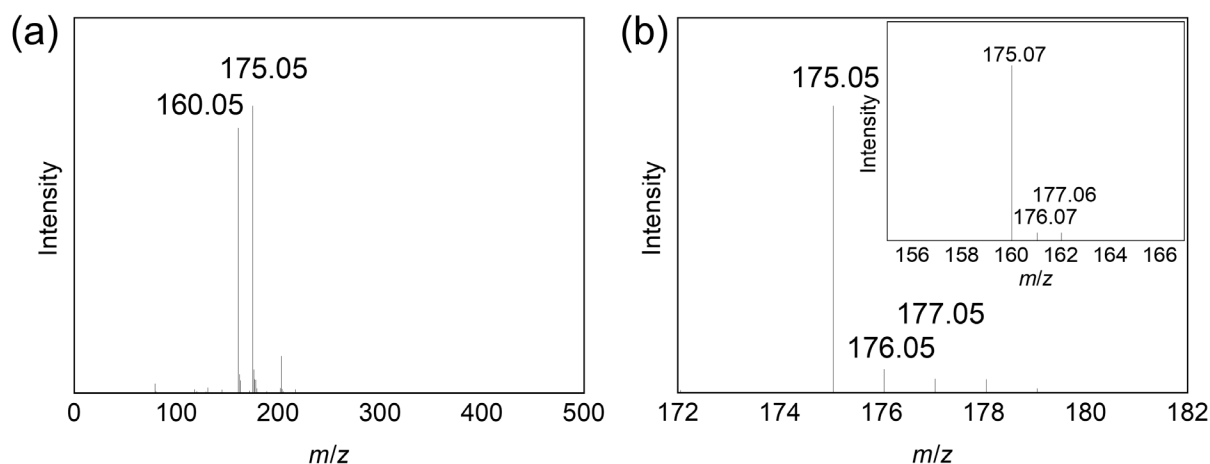

**Fig. S9** ESI-MS spectra for a mixture of 1-hydroxyethyl-5-methylthio-1H-tetrazole and  $\text{CH}_3\text{I}$  after the reaction in MeOH. (a) A wide range of MS spectrum. (b) MS (ESI, +)  $m/z$ :  $[\text{M}+\text{CH}_3]^+$ , Calcd. for  $\text{C}_5\text{H}_{11}\text{N}_4\text{OS}^+$  175.07; Found: 175.05.

## 6. Selectivity test

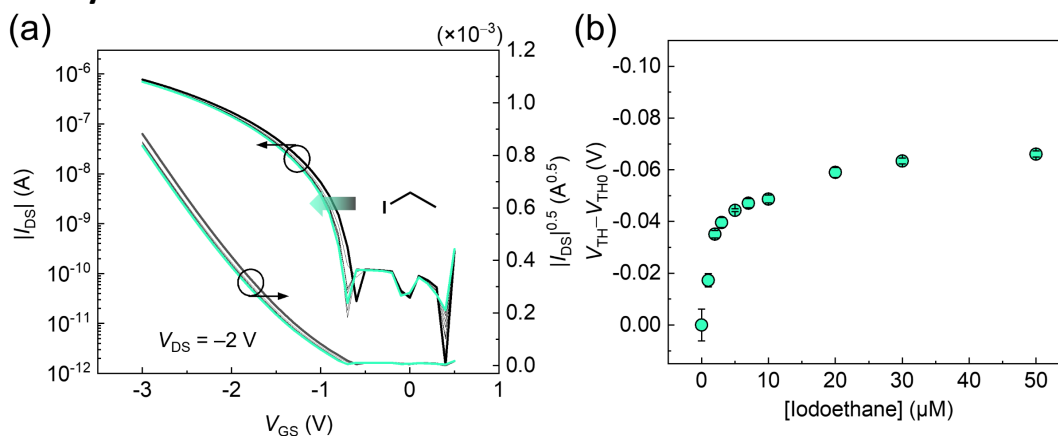

**Fig. S10** (a) Transfer characteristics of the EMT-attached OFET upon adding  $\text{CH}_3\text{CH}_2\text{I}$  in 100 mM HEPES buffer with 100 mM NaCl at pH 7.4. (b) The titration isotherm obtained by collecting  $V_{\text{TH}}$  at each concentration of  $\text{CH}_3\text{CH}_2\text{I}$  from 0 to 50  $\mu\text{M}$ . The terms  $V_{\text{TH0}}$  and  $V_{\text{TH}}$ , respectively, indicate threshold voltages before and after adding  $\text{CH}_3\text{CH}_2\text{I}$ .

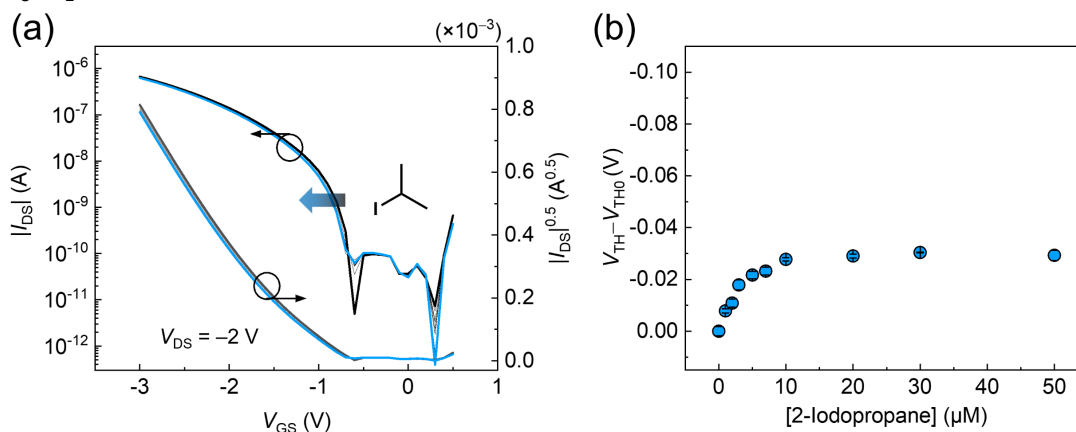

**Fig. S11** (a) Transfer characteristics of the EMT-attached OFET upon adding  $(\text{CH}_3)_2\text{CH-I}$  in 100 mM HEPES buffer with 100 mM NaCl at pH 7.4. (b) The titration isotherm obtained by collecting  $V_{\text{TH}}$  at each concentration of  $(\text{CH}_3)_2\text{CH-I}$  from 0 to 50  $\mu\text{M}$ . The terms  $V_{\text{TH0}}$  and  $V_{\text{TH}}$ , respectively, indicate threshold voltages before and after adding  $(\text{CH}_3)_2\text{CH-I}$ .

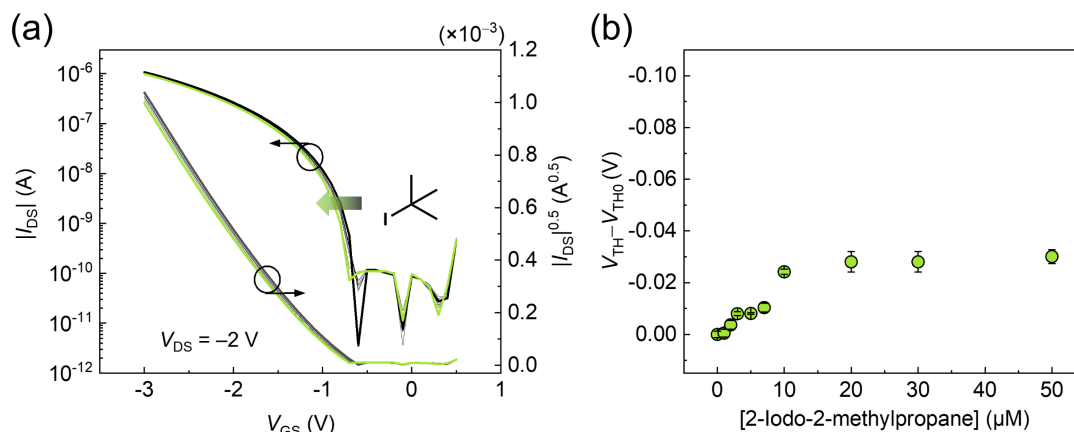

**Fig. S12** (a) Transfer characteristics of the EMT-attached OFET upon adding  $(\text{CH}_3)_3\text{C-I}$  in 100 mM HEPES buffer with 100 mM NaCl at pH 7.4. (b) The titration isotherm obtained by collecting  $V_{\text{TH}}$  at each concentration of  $(\text{CH}_3)_3\text{C-I}$  from 0 to 50  $\mu\text{M}$ . The terms  $V_{\text{TH0}}$  and  $V_{\text{TH}}$ , respectively, indicate threshold voltages before and after adding  $(\text{CH}_3)_3\text{C-I}$ .

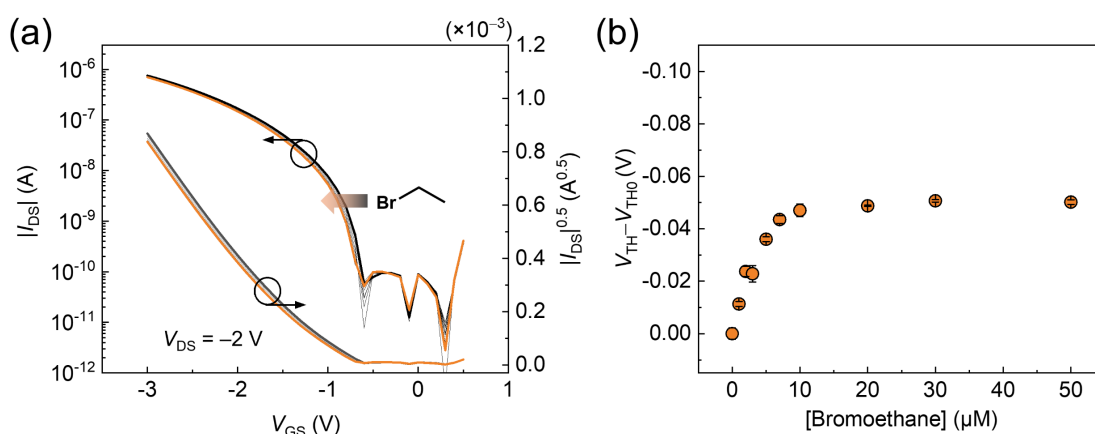

**Fig. S13** (a) Transfer characteristics of the EMT-attached OFET upon adding  $\text{CH}_3\text{CH}_2\text{Br}$  in 100 mM HEPES buffer with 100 mM NaCl at pH 7.4. (b) The titration isotherm obtained by collecting  $V_{\text{TH}}$  at each concentration of  $\text{CH}_3\text{CH}_2\text{Br}$  from 0 to 50  $\mu\text{M}$ . The terms  $V_{\text{TH0}}$  and  $V_{\text{TH}}$ , respectively, indicate threshold voltages before and after adding  $\text{CH}_3\text{CH}_2\text{Br}$ .

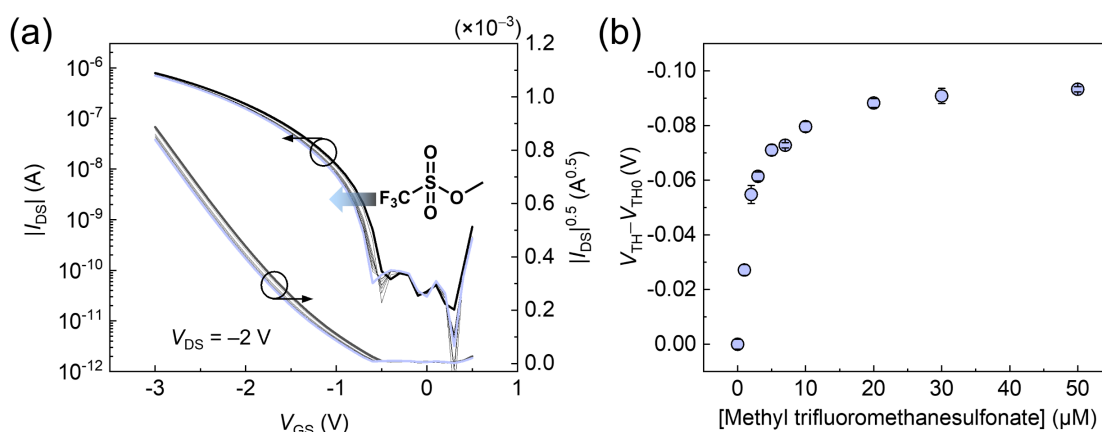

**Fig. S14** (a) Transfer characteristics of the EMT-attached OFET upon adding  $\text{CF}_3\text{SO}_3\text{CH}_3$  in 100 mM HEPES buffer with 100 mM NaCl at pH 7.4. (b) The titration isotherm obtained by collecting  $V_{\text{TH}}$  at each concentration of  $\text{CF}_3\text{SO}_3\text{CH}_3$  from 0 to 50  $\mu\text{M}$ . The terms  $V_{\text{TH0}}$  and  $V_{\text{TH}}$ , respectively, indicate threshold voltages before and after adding  $\text{CF}_3\text{SO}_3\text{CH}_3$ .



## 7. Semi-quantitative assay

The transfer characteristics at each electrophile concentration were measured with three repetitions for PCA. The inset data contained normalized drain currents (i.e.,  $|(I_{DS}-I_{DS0})/I_{DS}|$ , at  $V_{GS} = -1$  to  $-3$  V), where  $I_{DS0}$  and  $I_{DS}$  represent the drain current before and after adding electrophiles. We constructed PCA with a Python platform with scikit-learn. Principal components (PC) are orthogonal eigenvectors that locate in the direction of the maximum variance within the inset data.<sup>S3</sup> The order of contribution in variance during feature reduction is described as PC1 and PC2 constructed by shifts in  $I_{DS}$ .

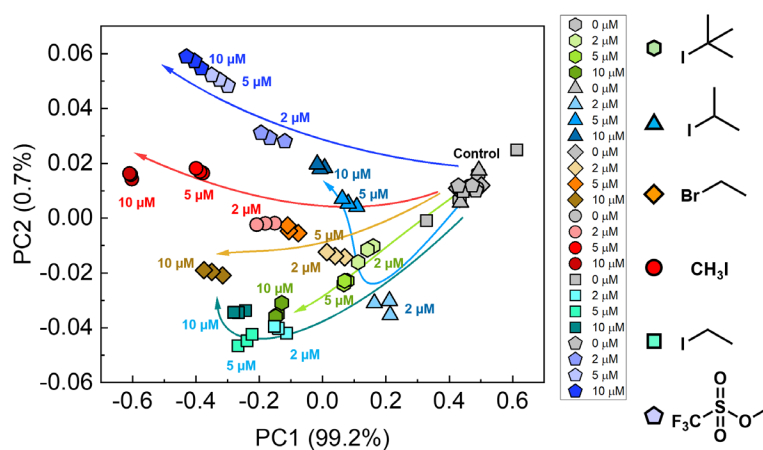

**Fig. S15** PCA plot for the response patterns of six electrophiles at different concentrations (0, 2, 5, and 10  $\mu$ M).

## References

- S1. H. Fan, Y. Sasaki, Q. Zhou, W. Tang, Y. Nishina, T. Minami, *Chem. Commun.*, 2023, **59**, 2425–2428.
- S2. T. Minamiki, T. Minami, R. Kurita, O. Niwa, S. Wakida, K. Fukuda, D. Kumaki, S. Tokito, *Appl. Phys. Lett.*, 2014, **104**, 243703.
- S3. P. Anzenbacher, Jr., P. Lubal, P. Buček, M. A. Palacios and M. E. Kozelkova, *Chem. Soc. Rev.*, 2010, **39**, 3954–3979.
